# Supplementary material
Source: publisher site journal article supplement (http://www.degruyter.com/publication/journal_key/ROMS/downloadAsset/ROMS_ROMS_MANUSCRIPT%20GUIDELINES.pdf)
Supplement: Supplementary file 1 [file ROMS_ROMS_MANUSCRIPT%20GUIDELINES.pdf]

## REVIEW OF MARKETING SCIENCE (ROMS)

### MANUSCRIPT PREPARATION GUIDELINES

This document provides authors with details on policy, copyediting, formatting, and layout requirements pertaining to final manuscript submission to this journal. **All manuscripts must have correct formatting to be considered for publication.**

The manuscript submission and review process are handled through ScholarOne Manuscripts. All manuscripts should be submitted to <http://mc.manuscriptcentral.com/dgroms>

### EDITORIAL POLICY

**Unpublished material:** Submission of a manuscript implies that the work described is not copyrighted, published or submitted elsewhere, except in abstract form. The corresponding author should ensure that all authors approve the manuscript before its submission.

**Copyright:** Manuscripts are accepted on condition of transfer of copyright (for U.S. government employees: to the extent transferable) to Review of Marketing Science. Once the manuscript is accepted, it may not be published elsewhere without the consent of the copyright holders.

### GENERAL MANUSCRIPT REQUIREMENTS

#### Submission Files

The submission of a manuscript requires uploading at least one file: 'main document' (anonymous). This document should not contain information about the authors. Additionally, if there are any figures or tables, they should also be submitted separately.

The manuscript should be submitted as Microsoft Word files. If the manuscript contains special characters, equations, etc. please make sure to also supply a PDF version as a reference file.

LaTeX files are also acceptable.

#### Language

The manuscript should be written in clear and concise English (either British or American standard, but not the mixture of both).

Please, refer to the end of the guide for information regarding language editing.

#### Length

There is no limit on the length of the manuscript. However, authors should avoid adding superfluous information to their documents.

#### Title, Abstract and Keywords

The first page of the main document should include the title of the manuscript, a short unstructured abstract (between 150 and 200 words approximately) and 3-6 keywords.

#### Fonts

Only use Unicode fonts (e.g. Times New Roman, Arial).

To indicate text you wish to emphasize, please use italics rather than underlining.

Foreign terms and Titles of books, movies, etc. should be set in italics rather than underlined.

## REVIEW OF MARKETING SCIENCE (ROMS)

### Coloured Text

The use of colour to emphasize text is discouraged. Please, set the font colour to black for the majority of the text.

De Gruyter encourages authors to take advantage of the ability to use colour in the production of figures, maps, images, and graphs. However, you need to appreciate that this will cause some of your readers problems when they print the document on a black and white printer. For this reason, you are advised to avoid the use of colours in situations where their translation to black and white would render the material illegible or incomprehensible.

### Structure

Please use the following structure: Introduction-Main Sections (e.g., Literature Review, Methodology....)-Appendices (if needed), Explanation of Symbols (if needed), References

All sections and subsections must be numbered (except for 'References').

Headings (e.g., titles of sections) should be distinguished from the main body text by clearly indicating the heading hierarchy (e.g., 2.1, 2.2...) and capitalizing the first word while leaving the rest in lowercase. Please use bold for headings.

### Abbreviations

The use of abbreviations and acronyms is permitted provided they are defined the first time they are used. In order to gain readability, try not to use more than 3-4.

### Footnotes

Footnotes must appear at the bottom of the page on which they are referenced rather than at the end of the paper.

Excessively long footnotes are better handled in an appendix.

## TABLES AND FIGURES

Only figures (graphs, line drawings, photographs, etc) should be labelled as 'figures', not tables or equations.

Figures and tables should be supplied in separate files, not embedded in the text. Indicate the approximate placement of each figure and table in the text (e.g., Figure 1 here).

Number figures and tables consecutively using Arabic numerals (Figure 1, Table 1, etc.).

Provide a short descriptive title, column headings, and (if necessary) footnotes to make them self-explanatory.

Tables must not be displayed as images.

### Format requirements

All illustrations must be of reproduction-ready quality and in EPS, TIF, or JPG format. They will be reduced in size to fit, whenever possible, the width of a single column. Lettering of all figures within the article should be uniform in style (preferably a Sans Serif typeface like Helvetica) and of sufficient size (ca. 8 pt.). Uppercase letters A, B, C, etc. should be used to identify parts of multi-part figures.

- *Halftone figures* (grayscale and colour) should have a minimum resolution of 300 dpi and be of good contrast.

## REVIEW OF MARKETING SCIENCE (ROMS)

- *Line drawings* must be of reproduction-ready quality. Please note that faint shading may be lost upon reproduction. When drawing bar graphs, use patterning instead of grey scales. Lettering of all figures should be uniform in style. A resolution of 1200 dpi is recommended.

### Permissions

It is the authors' responsibility to obtain permission to reproduce original or modified material that has been previously published. Any permissions fees are the responsibility of the author(s).

### MATH SYMBOLS AND EQUATIONS

- Roman letters used in mathematical expressions as variables must be italicized. Roman letters used as part of multi-letter function names should not be italicized. Subscripts and superscripts must be a smaller font size than the main text.
- Type short mathematical expressions inline.
- Longer expressions must appear as display math, as must expressions using many different levels (e.g., such as fractions).
- Ensure that equations are typed or created with a plug-in, such as Word Formula Editor or MathType. Mathematical expressions must not be displayed as images.
- Important definitions or concepts can also be set off as display math.
- Number your equations sequentially.
- Insert a blank line before and after each equation.
- Whether equation numbers are on the right or left is the choice of the author(s). However, make sure to be consistent in this.
- When proofing your document, pay particular attention to the rendering of the mathematics, especially symbols and notation drawn from other-than-standard fonts.

### REFERENCES

Please use the Chicago Manual of Style author-date system for parenthetical citation in the text and the related reference list entry. Below you can see some examples. For more specific details please visit: [http://www.chicagomanualofstyle.org/tools\\_citationguide.html](http://www.chicagomanualofstyle.org/tools_citationguide.html) and click on the Author-Date tab.

**Citations:** Price and quality are interrelated factors (Liu 2022; Park and Liu 2021; Smith, Park, and Liu 2020; Smith et al. 2021).

Please use 'et al.' when referencing more than three authors.

**In-text Citations:** As Smith et al. (2021) explain....

**Book:** Hayes, A. F. 2022. *Introduction to Mediation, Moderation, and Conditional Process Analysis: A Regression-Based Approach*, 3rd ed. New York: Guilford Publications.

**Book Chapter:** Guadagno, R., and R. Cialdini. 2005. "Online Persuasion and Compliance: Social Influence on the Internet and beyond." In *The Social Net: Understanding Human Behavior in Cyberspace*, edited by Y. Amichai-Hamburger, 91–113. Oxford: Oxford University Press.

## REVIEW OF MARKETING SCIENCE (ROMS)

**Journal Article:** Kamolsook, A., Y. F. Badir, and B. Frank. 2019. "Consumers' Switching to Disruptive Technology Products: The Roles of Comparative Economic Value and Technology Type." *Technological Forecasting and Social Change* 140: 328–40.

**Conference:** Boukis, A., and S. Magrizos. 2018. "Managing Brands in the Blockchain Era." In *Annual Macromarketing Conference, Leipzig*.

**Conference (proceedings):** Broeder, P., and E. Remers. 2018. "Eye Contact and Trust Online: The Effect of Profile Pictures on Airbnb Booking." In *Proceedings of the IEEE 12th International Conference on Application of Information and Communication Technologies*, 336–9. Almaty: AICT.

**Report (available online):** Cryptoasset Consumer Research Report. 2020. Also available at <https://www.fca.org.uk/publication/research/research-note-cryptoasset-consumer-research-2020.pdf>.

## COPYEDITING/LANGUAGE EDITING

The ScholarOne system has been designed to improve the scholarly publication process for authors. Among the many improvements we offer over traditional journals, the most significant is that we have dramatically shortened the period between the acceptance and the final publication of a peer-reviewed article. Much of this time savings is due to the innovative use of electronic publication. These innovations, however, require certain changes in the way authors need to prepare accepted manuscripts for electronic publication.

De Gruyter does provide a light copyedit of manuscripts for this journal, but authors remain responsible for being their own copyeditors.

## OFFPRINTS

The electronic files of typeset articles in Adobe Acrobat PDF format are provided free of charge; corresponding authors receive notification that their article has been published online. Paper offprints can be ordered in addition; an offprint order form will accompany the page proofs and should be completed and returned with the corrected proofs immediately.
